# Supplementary material
Source: Springer Nature journal article supplement (https://www.springermedizin.de/resource/supplementary/13075_2012_3845_MOESM1_ESM.pdf/9695458)

**(a)**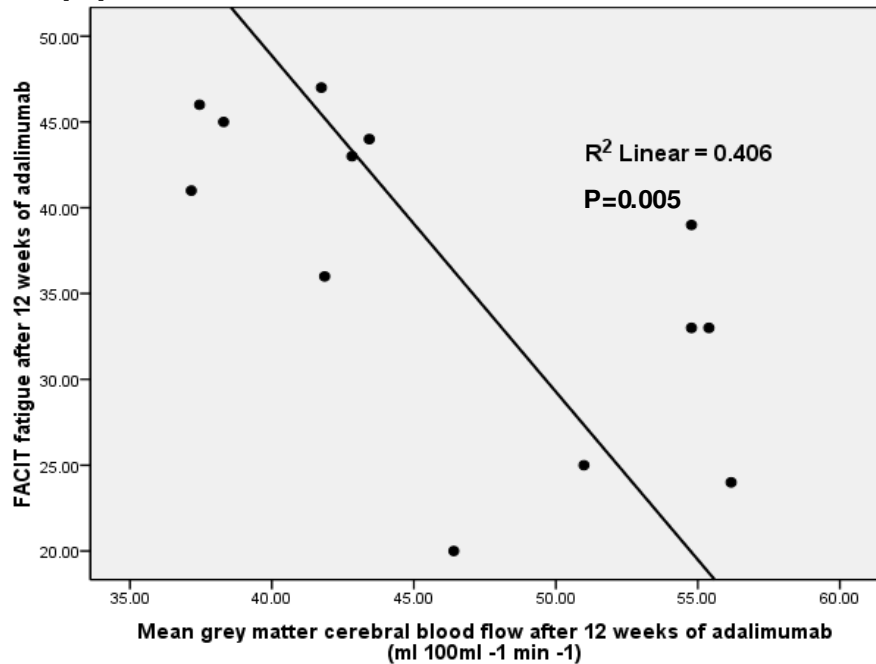**(b)**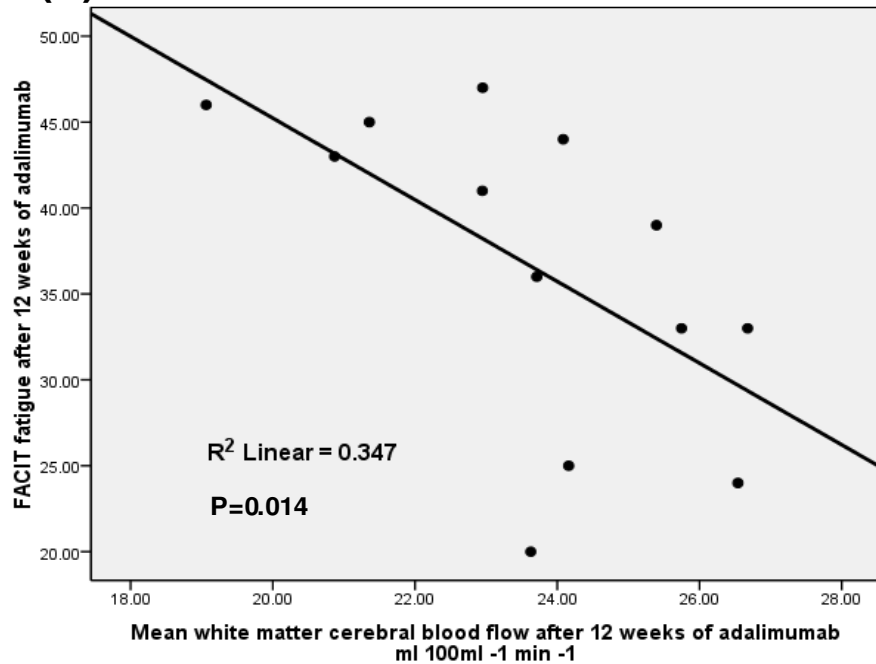

Supplement: MOESM1 [file 9695458]
